# Supplementary material for: Mitigating the negative impacts of tall wind turbines on bats: Vertical activity profiles and relationships to wind speed
Source: PLOS journal article supplement (doi:10.1371/journal.pone.0192493), 2018-03-21
Supplement: S5 (10.1371/journal.pone.0192493.s005) [file journal.pone.0192493.s005]

## Supporting information

**S3 Table. Generalized linear mixed models describing the relationship between bat activity and wind speed (metrics 1 and 2).** GLMMs included bat activity (presence/absence) as dependent variable with wind speed as explanatory variable and recording night as a random factor. Modelling was carried out for all recorded bat species, the two most common recorded species *P. pipistrellus* and *H. savii* and the rare species *M. myotis*/*M. blythii* and *T. teniotis* on the crane for all heights (5-65 m) and for the dangerous zone only (50-65 m). The same modelling approach was applied to activity data of all bat species obtained from ground level at the six foreseen wind turbine sites.

| Bat species                          | Data origin | Height         | Fixed effects | Estimate | Std. Error | z value | p value          |
|--------------------------------------|-------------|----------------|---------------|----------|------------|---------|------------------|
| All bat species                      | Crane       | All heights    | Intercept     | 0.785    | 0.639      | 1.109   | 0.267            |
|                                      |             |                | Wind speed    | -0.828   | 0.159      | -5.214  | <b>&lt;0.001</b> |
|                                      |             | Dangerous zone | Intercept     | -0.034   | 0.721      | -0.048  | 0.962            |
|                                      |             |                | Wind speed    | -0.530   | 0.227      | -2.337  | <b>0.019</b>     |
|                                      | Ground      |                | Intercept     | 0.504    | 0.841      | 0.600   | 0.549            |
|                                      |             |                | Wind speed    | 0.603    | 0.259      | 2.331   | <b>0.020</b>     |
| <i>P. pipistrellus</i>               | Crane       | All heights    | Intercept     | 0.594    | 0.684      | 0.868   | 0.386            |
|                                      |             |                | Wind speed    | -1.124   | 0.191      | -5.802  | <b>&lt;0.001</b> |
|                                      |             | Dangerous zone | Intercept     | -0.578   | 1.251      | -0.462  | 0.644            |
|                                      |             |                | Wind speed    | -1.133   | 0.486      | -2.334  | <b>0.020</b>     |
| <i>H. savii</i>                      | Crane       | All heights    | Intercept     | -1.952   | 0.002      | -1008.2 | <b>&lt;0.001</b> |
|                                      |             |                | Wind speed    | -0.577   | 0.002      | -297.7  | <b>&lt;0.001</b> |
|                                      |             | Dangerous zone | Intercept     | -2.031   | 0.805      | -2.524  | <b>0.012</b>     |
|                                      |             |                | Wind speed    | -0.432   | 0.396      | -1.091  | 0.275            |
| <i>M. myotis</i> / <i>M. blythii</i> | Crane       | All heights    | Intercept     | -3.310   | 0.718      | -4.608  | <b>&lt;0.001</b> |
|                                      |             |                | Wind speed    | -0.258   | 0.245      | -1.053  | 0.292            |
|                                      |             | Dangerous zone | Intercept     | -12.108  | 7.934      | -1.526  | 0.127            |
|                                      |             |                | Wind speed    | 1.175    | 0.958      | 1.227   | 0.220            |
| <i>T. teniotis</i>                   | Crane       | All heights    | Intercept     | -1.891   | 0.002      | -936.2  | <b>&lt;0.001</b> |
|                                      |             |                | Wind speed    | -0.572   | 0.002      | -283.3  | <b>&lt;0.001</b> |
|                                      |             | Dangerous zone | Intercept     | -1.451   | 0.801      | -1.811  | 0.070            |
|                                      |             |                | Wind speed    | -0.458   | 0.313      | -1.467  | 0.142            |
